# Supplementary material for: Developments and applications of the OPTIMADE API for materials discovery, design, and data exchange
Source: Royal Society of Chemistry journal article supplement (doi:10.1039/d4dd00039k), 2024-01-01
Supplement: d4dd00039k1.pdf [file d4dd00039k1.pdf]

## Supplementary Information

# Developments and applications of the OPTIMADE API for materials discovery, design, and data exchange

Matthew L. Evans,<sup>1,2</sup> Johan Bergsma,<sup>3,†</sup> Andrius Merkys,<sup>4</sup> Casper W. Andersen,<sup>5</sup> Oskar B. Andersson,<sup>6</sup> Daniel Beltrán,<sup>7</sup> Evgeny Blokhin,<sup>8,9</sup> Tara M. Boland,<sup>10</sup> Rubén Castañeda Balderas,<sup>11</sup> Kamal Choudhary,<sup>12</sup> Alberto Díaz Díaz,<sup>11</sup> Rodrigo Domínguez García,<sup>11</sup> Hagen Eckert,<sup>13,14</sup> Kristjan Eimre,<sup>15</sup> María Elena Fuentes Montero,<sup>16</sup> Adam M. Krajewski,<sup>17</sup> Jens Jørgen Mortensen,<sup>10</sup> José Manuel Nápoles Duarte,<sup>16</sup> Jacob Pietryga,<sup>18</sup> Ji Qi,<sup>19</sup> Felipe de Jesús Trejo Carrillo,<sup>11</sup> Antanas Vaitkus,<sup>4</sup> Jusong Yu,<sup>15</sup> Adam Zettel,<sup>13,14</sup> Pedro Baptista de Castro,<sup>20</sup> Johan Carlsson,<sup>21</sup> Tiago F. T. Cerqueira,<sup>22</sup> Simon Divilov,<sup>13,14</sup> Hamidreza Hajiyani,<sup>21,‡</sup> Felix Hanke,<sup>23</sup> Kevin Jose,<sup>24</sup> Corey Oses,<sup>25</sup> Janosh Riebesell,<sup>24,26</sup> Jonathan Schmidt,<sup>27</sup> Donald Winston,<sup>28</sup> Christen Xie,<sup>19</sup> Xiaoyu Yang,<sup>29,30,31</sup> Sara Bonella,<sup>3</sup> Silvana Botti,<sup>32</sup> Stefano Curtarolo,<sup>13,14</sup> Claudia Draxl,<sup>33</sup> Luis Edmundo Fuentes Cobas,<sup>11</sup> Adam Hospital,<sup>7</sup> Zi-Kui Liu,<sup>17</sup> Miguel A. L. Marques,<sup>32</sup> Nicola Marzari,<sup>15,34</sup> Andrew J. Morris,<sup>35</sup> Shyue Ping Ong,<sup>19</sup> Modesto Orozco,<sup>7</sup> Kristin A. Persson,<sup>26,36</sup> Kristian S. Thygesen,<sup>10</sup> Chris Wolverton,<sup>18</sup> Markus Scheidgen,<sup>33</sup> Cormac Toher,<sup>37,14</sup> Gareth J. Conduit,<sup>24</sup> Giovanni Pizzi,<sup>15,34</sup> Saulius Gražulis,<sup>4,38</sup> Gian-Marco Rignanese,<sup>1,2,39</sup> Rickard Armiento<sup>6</sup>

<sup>1</sup> UCLouvain, Institut de la Matière Condensée et des Nanosciences (IMCN), Chemin des Étoiles 8, Louvain-la-Neuve 1348, Belgium

<sup>2</sup> Matgenix SRL, 185 Rue Armand Bury, 6534 Gozée, Belgium

<sup>3</sup> Centre Européen de Calcul Atomique et Moléculaire (CECAM), École Polytechnique Fédérale de Lausanne, Avenue de Forel 3, 1015 Lausanne, Switzerland

<sup>4</sup> Institute of Biotechnology, Life Sciences Center, Vilnius University, Saulėtekio av. 7, LT-10257 Vilnius, Lithuania

<sup>5</sup> SINTEF, P.O. Box 4760 Torgarden, NO-7465 Trondheim, Norway

<sup>6</sup> Materials Design and Informatics unit, Department of Physics, Chemistry and Biology, Linköping University, Sweden

<sup>7</sup> Institute for Research in Biomedicine (IRB Barcelona), Baldori i Reixac 10-12, 08028 Barcelona, Spain

<sup>8</sup> Tilde Materials Informatics, Straßmannstraße 25, 10249, Berlin, Germany

<sup>9</sup> Materials Platform for Data Science, Sepapaja 6, 15551, Tallinn, Estonia

<sup>10</sup> Computational Atomic-Scale Materials Design, Technical University of Denmark, Kgs. Lyngby, Denmark

<sup>11</sup> Centro de Investigación en Materiales Avanzados, S.C. (CIMAV), Av. Miguel de Cervantes 120, Complejo Industrial Chihuahua, 31136, Chihuahua, Chih., México

<sup>12</sup> Material Measurement Laboratory, National Institute of Standards and Technology, Gaithersburg, MD, 20899, USA

<sup>13</sup> Department of Mechanical Engineering and Materials Science, Duke University, Durham, NC 27708, USA

<sup>14</sup> Center for Extreme Materials, Duke University, Durham, NC 27708, USA

<sup>15</sup> Theory and Simulation of Materials (THEOS), and National Centre for Computational Design and Discovery of Novel Materials (MARVEL), École Polytechnique Fédérale de Lausanne, 1015 Lausanne, Switzerland

<sup>16</sup> Universidad Autónoma de Chihuahua, Facultad de Ciencias Químicas, 31125 Chihuahua, México

<sup>17</sup> Department of Materials Science and Engineering, The Pennsylvania State University, University Park, PA 16802, USA

<sup>18</sup> Department of Materials Science and Engineering, Northwestern University, Evanston, IL 60208, USA

<sup>19</sup> Department of NanoEngineering, University of California, San Diego, 9500 Gilman Drive, La Jolla, California, 92093-0448, United States

<sup>20</sup> National Institute for Materials Science, 1-2-1 Sengen, Tsukuba, Ibaraki, 305-0047 Japan

<sup>21</sup> Dassault Systèmes Germany GmbH, Am Kabellager 11-13, 51063 Cologne, Germany

<sup>22</sup> CFisUC, Department of Physics, University of Coimbra, Rua Larga, 3004-516 Coimbra, Portugal

<sup>23</sup> Dassault Systèmes, 22 Science Park, CB4 0FJ, United Kingdom.

<sup>24</sup> Theory of Condensed Matter, Cavendish Laboratory, Cambridge, United Kingdom

<sup>25</sup> Department of Materials Science and Engineering, Johns Hopkins University, Baltimore, MD 21218, USA

<sup>26</sup> Lawrence Berkeley National Lab, Berkeley, CA, USA

<sup>27</sup> Materials Theory, ETH Zürich, Wolfgang-Pauli-Strasse 27, 8093 Zurich, Switzerland

<sup>28</sup> Polyneme LLC, New York, NY 10038, USA

<sup>29</sup> Computer Network Information Center, Chinese Academy of Sciences, Beijing, 100083, China

<sup>30</sup> University of Chinese Academy of Sciences, Beijing, 101408, China

<sup>31</sup> Beijing MaiGao MatCloud Technology Co. Ltd., Beijing, 100149, China

<sup>32</sup> Research Center Future Energy Materials and Systems of the University Alliance Ruhr and Interdisciplinary Centre for Advanced Materials Simulation, Ruhr University Bochum, Universitätsstraße 150, D-44801 Bochum, Germany

<sup>33</sup> Humboldt-Universität zu Berlin, Institut für Physik and IRIS Adlershof, 12489 Berlin, Germany

<sup>34</sup> Laboratory for Materials Simulations (LMS), Paul Scherrer Institute (PSI), 5232 Villigen PSI, Switzerland

<sup>35</sup> School of Metallurgy and Materials, University of Birmingham, Edgbaston, Birmingham B15 2TT, United Kingdom

<sup>36</sup> Department of Materials Science and Engineering, UC Berkeley, Hearst Mining Memorial Building, Berkeley, 94720 CA, USA

<sup>37</sup> Department of Materials Science and Engineering and Department of Chemistry and Biochemistry, The University of Texas at Dallas, Richardson, TX 75080, USA

<sup>38</sup> Institute of Computer Science, Faculty of Mathematics and Informatics, Vilnius University, Naugarduko g. 24, LT-03225 Vilnius, Lithuania

<sup>39</sup> School of Materials Science and Engineering, Northwestern Polytechnical University, Xi'an, Shaanxi, 710072, China

† Present address: Van 't Hoff Institute for Molecular Sciences, University of Amsterdam, PO Box 94157, 1090 GD Amsterdam, Netherlands

‡ Present address: Henkel, AID/Digital Twins & Data Analytics, 40589 Düsseldorf, Germany

| PROVIDER          | N <sub>1</sub>        | N <sub>2</sub>    | N <sub>3</sub>        | N <sub>tot</sub> |
|-------------------|-----------------------|-------------------|-----------------------|------------------|
| AFLOW             | 704,302 (700,192)     | 63,017 (62,293)   | 413,797 (382,554)     | 3,530,330        |
| Alexandria*       | 939,084               | 48,510            | 437,768               | 5,055,842        |
| COD               | 458,249 (416,314)     | 4,082 (3,896)     | 34,739 (32,420)       | 512,282          |
| CMR               | 2,811                 | 386               | 0                     | 16,789           |
| JARVIS-DFT        | 9,017                 | 1,426             | 8,084                 | 77,096           |
| Materials Cloud*  | 961,564               | 4,218             | 136,176               | 4,515,120        |
| Materials Project | 34,424 (27,309)       | 3,750 (3,545)     | 11,861 (10,501)       | 154,387          |
| MPDD              | 811,136               | 80,195            | 490,900               | 3,975,666        |
| MPOD              | 91                    | 8                 | 16                    | 401              |
| MPDS              | -                     | -                 | -                     | 507,178          |
| NOMAD             | 4,451,056 (3,359,594) | 587,923 (532,123) | 2,092,989 (1,611,302) | 12,116,021       |
| odbx*             | 125,648 (55)          | 3,179 (54)        | 17,009 (0)            | 523,216          |
| omdb              | 58,718 (58,718)       | 690 (690)         | 7,428 (7,428)         | 68,566           |
| OQMD              | 261,400 (153,113)     | 15,375 (11,011)   | 81,673 (70,252)       | 1,226,781        |
| TCOD              | 7,161 (2,631)         | 296 (296)         | 662 (660)             | 7,452            |
| 2DMatpedia        | 1,172                 | 739               | 255                   | 6,351            |

Table 1. The table from Ref.<sup>1</sup> recreated in March 2024, with new providers. The final column indicates the total number of structures served by each OPTIMADE API. Providers that serve multiple databases are indicated with \*. Results for Materials Cloud and Materials Cloud Archive have been aggregated under the same title. The corresponding values from the 2021 paper<sup>1</sup> are provided in brackets, where appropriate.

## References

- 1 C. W. Andersen et al. OPTIMADE: an API for exchanging materials data. *Scientific Data*, 8:217, 2021. DOI: [10.1038/s41597-021-00974-z](https://doi.org/10.1038/s41597-021-00974-z).
